# Supplementary material for: Use of a self-rating scale to monitor depression severity in recurrent GP consultations in primary care – does it really make a difference? A randomised controlled study
Source: PubMed Central journal article supplement (PMC5244530; doi:10.1186/s12875-016-0578-9), 2017-01-19
Supplement: 12875_2016_578_MOESM2_ESM.pdf [file 12875_2016_578_MOESM2_ESM.pdf]

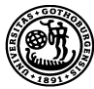

**Project MADRS-S/PRI-SMA**

**Date**

**Patient questionnaire 2 – follow-up**

**Name**

**Pers nb (10 nb)**

**ID nr: gender nr**  
(given by the nurse)

**Age**.....

**What is your occupation now?**

*Obs! only one alternative.*

- 1  Work as employee
- 2  Own employer
- 3  Studying
- 4  Long time sick-leave or early retirement
- 5  Parental leave
- 6  In search of work
- 7  Working at home with the household
- 8  Pensioner

**Your occupation** .....

**Do you smoke?**

Yes

No

Sometimes

**How often are you physically active (running, bicycling, training etc) at least 30 minutes at one time?**

- 1  4 times or more per week
- 2  2-3 times per week
- 3  1 time per week
- 4  Some time per month
- 5  Never

**How often are you physically active at leisure time?**

If your activity changes much from summer to winter, try to make an average  
The question concerns the latest year. **Only tic one box.**

**Mostly sitting in leisure time -sedentary**

Mostly reading, television, cinema, computer.

**Medium physically active at leisure time**

Walking, bicycling, ore move in some way at least 4 hours per week.

**Regular atheltics or trainig**

Running, swimming, tennis, badminton, or hard work in the garden etc at least 2-3 hours a week.

**Hard training or competitive sport .**

Hard training several times a week

**Have you been on sick-leave during the last 3 months?**

No

Yes

Yes, in total .....days

**Du you regularly use medicines??**

No

Yes

**I use the following medicines regularly**

.....

.....

.....

**How satisfied are you with the treatment you have had for depression during the last 3 months?**

(1 means you are not at all satisfied, and 10 that you are completely satisfied with the treatment )

1   2   3   4   5   6   7   8   9   10

**Thanks for answering the questions!**
