# Supplementary material for: Use of a self-rating scale to monitor depression severity in recurrent GP consultations in primary care – does it really make a difference? A randomised controlled study
Source: Springer Nature journal article supplement (doi:10.1186/s12875-016-0578-9), 2017-01-19
Supplement: MOESM1 [file 12008184]

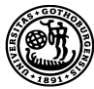

**Projekt MADRS-S/PRI-SMA in Primary Care**

Date

**Patient background questionnaire 1**

**Name**

**Pers nb (10 digits)**

**ID nr: gender nr**  
(given by the nurse)

**Age .....**

**Are you**      Man     

                  Woman     

**Civilstånd**    Unmarried     

                  Married     

                  Partners     

                  Divorced     

                  Widow/widower     

**Är du**            Living together     

                  Living alone     

**Number of children living at home under 18?**

**Do you smoke?**

Yes     

No     

Sometimes     

Have smoked but not last year

## Your education

- Primary school
- Upper secondary
- University
- Special vocational

## What is your main occupation today?

*Obs! Only one alternative.*

- 1  Employee
- 2  Self-employed
- 3  Studying
- 4  On long timer sick-leave or early retirement
- 5  Childcare leave
- 6  In search for work
- 7  Working in my household
- 8  Pensioner

**Profession** .....

In which country were you born? .....

If you were not born in Sweden, when did you move here? Year  
.....

## How often are you physcally active (running, bicycling, training etc) at least 30 minutes at one time?

- 1  4 times or more per week
- 2  2-3 times per week
- 3  1 time per week
- 4  Some time per month
- 5  Never

**How often are you physically active at leisure time?**

If your activity changes much from summer to winter, try to make an average  
The question concerns the latest year.

**Mostly sitting in leisure time - sedentary**

Mostly reading, television, cinema, computer.

**Medium physically active at leisure time**

Walking, bicykling, ore move in some way at least 4 hours per week.

**Regular athletics or training**

Running, swimming, tennis, badminton, or hard work in the garden etc at least 2-3 hours a week.

**Hard training or competitive sport**

Hard training several times a week

**Are you on sick-leave just now?**

No

Yes  Reason.....

**If you are on sick-leave just now, when do you think you will be back at work part-or fulltime?**

- 1  In 1- 4 weeks
- 2  In 2- 6 months
- 3  In 7 - 12 months
- 4  After 1 år
- 5  Never
- 6  Don't know

**Do you use medicines regularly?**

No

yes

**I use the following medicines regularly:**

.....

.....

.....

**Thanks for your cooperation!**
